# Supplementary material for: The pupillary light response as a physiological index of aphantasia, sensory and phenomenological imagery strength
Source: eLife. 2022 Mar 31;11:e72484. doi: 10.7554/eLife.72484 (PMC9018072; doi:10.7554/eLife.72484)
Supplement: Figure 1—source data 1. [file elife-72484-fig1-data1.csv]

SS1 _Bright	SS1 _Dark	SS4 _Bright	SS4 - Dark	Diff_SS1_imagery	Diff_SS4_Imagery	BR	PercepSS1 _Bright	PercepSS1 _Dark	PercepSS4 _Bright	PercepSS4 - Dark	PDiff_SS1_imagery	PDiff_SS4_Imagery
-0.245385	-0.06535	-0.076789	-0.165659	0.180035	-0.08887	66.49305	-0.320758648	0.21102107	-0.281850231	0.107294684	0.531779718	0.389144915
-0.495941	0.085924	-0.227803	0.143103	0.581865	0.370906	60.41695	-0.240121277	0.486137978	-0.19189745	0.715881568	0.726259255	0.907779018
-0.422629	-0.041061	0.008711	-0.149479	0.381568	-0.15819	67.3	0.296741984	0.646576557	0.283179103	0.596534847	0.349834573	0.313355745
-0.229807	-0.157826	0.100724	0.090274	0.071981	-0.01045	52.62835	-0.557451993	0.428540007	-0.371396417	0.423633734	0.985992	0.795030151
-0.195949	-0.078235	-0.029913	0.020435	0.117714	0.050348	56.25	-0.265281302	0.159702914	-0.204012279	0.150643222	0.424984216	0.354655501
-0.130429	-0.108115	-0.070618	0.023632	0.022314	0.09425	62.2475	-0.290819459	0.451705087	-0.390933682	0.796615135	0.742524546	1.187548817
-0.297134	-0.048953	0.004581	0.001631	0.248181	-0.00295	58.33335	-0.346029858	0.300709108	-0.044114616	0.495819407	0.646738966	0.539934023
-0.06123	-0.16847	-0.152746	-0.062849	-0.10724	0.089897	50.64025	-0.172575384	-0.023399071	-0.195951173	-0.135726696	0.149176313	0.060224477
-0.272423	0.020426	-0.084342	0.180136	0.292849	0.264478	71.66665	-0.547490006	0.155145523	-0.628843476	0.182209489	0.702635529	0.811052964
-0.287451	-0.090924	0.006492	0.135525	0.196527	0.129033	75.6757	-0.180230006	0.150936193	-0.193731774	0.169578991	0.331166199	0.363310765
-0.368755	-0.00431	-0.287544	-0.152582	0.364445	0.134962	67.67885	-0.679459645	0.381253012	-0.357321672	0.401177832	1.060712657	0.758499504
-0.080601	-0.079869	-0.032405	0.046472	0.000732	0.078877	57.36135	-0.46464932	0.297132079	-0.313983154	0.488572965	0.761781399	0.80255612
-0.463558	-0.150674	0.042102	0.033732	0.312884	-0.00837	50.6	-0.575189553	0.005659143	-0.483865999	0.095593344	0.580848696	0.579459343
-0.282192	-0.167727	-0.077448	0.156057	0.114465	0.233505	72.38675	-0.14432082	0.480908898	-0.586509262	0.48415974	0.625229718	1.070669003
-0.168366	-0.070379	-0.112315	0.052923	0.097987	0.165238	72.9392	-0.574886678	0.798657903	-0.431726608	0.51235341	1.373544581	0.944080018
-0.220424	-0.183595	-0.018381	0.009188	0.036829	0.027569	48.75	-0.130041511	0.373535935	-0.058193956	0.314467412	0.503577446	0.372661368
-0.149698	-0.120622	-0.137423	-0.135077	0.029076	0.002346	57.3481	-0.2065587	0.438180538	-0.49715707	0.417759525	0.644739238	0.914916595
-0.290983	0.059017	-0.012323	-0.020023	0.35	-0.0077	61.3838	0.047317345	0.019243346	-0.049580557	-0.014918446	-0.028073999	0.034662111
-0.401757	-0.003975	-0.105624	0.063984	0.397782	0.169608	87.5763	-0.399929072	0.13105193	-0.324783851	0.156832335	0.530981001	0.481616186
-0.381018	-0.211927	-0.204148	0.14195	0.169091	0.346098	57.4074	-0.408354139	-0.161886193	0.023195869	0.002812947	0.246467946	-0.020382921
-0.188266	-0.153947	0.074611	0.110339	0.034319	0.035728	54.3393	-0.183895359	0.291786289	-0.250122019	0.453369293	0.475681648	0.703491312
-0.278397	-0.077801	0.008517	0.187775	0.200596	0.179258	55.2178	-0.21794722	0.121504202	0.067288791	0.333634538	0.339451422	0.266345747
-0.114362	-0.205512	-0.160804	-0.187544	-0.09115	-0.02674	49.64915	-0.29315838	0.452368458	-0.169544455	0.603066237	0.745526838	0.772610692
-0.17897	0.15292	-0.212395	0.068212	0.33189	0.280607	70.09805	-0.601674992	0.421058241	-0.693372814	0.326882739	1.022733232	1.020255553
-0.305223	-0.127007	0.115071	0.110151	0.178216	-0.00492	56.62025	-0.099322367	-0.070742529	-0.213888811	0.223691657	0.028579838	0.437580468
-0.288206	-0.074106	0.002663	0.134613	0.2141	0.13195	64.89	-0.206386149	0.314207787	-0.161256149	0.184468458	0.520593936	0.345724607
-0.300048	0.030141	-0.079835	0.020304	0.330189	0.100139	52.5641	-0.132587132	0.353433877	-0.24280959	0.535105497	0.486021009	0.777915087
-0.370653	-0.025268	0.024461	0.117547	0.345385	0.093086	83.0357	-0.141303481	0.18827261	-0.033717655	0.332118171	0.329576091	0.365835826
-0.281706	-0.275924	-0.110515	0.170319	0.005782	0.280834	53.07925	-0.112685431	0.34734305	-0.234669963	0.414553395	0.460028481	0.649223359
-0.252325	-0.059976	-0.010397	0.01328	0.192349	0.023677	58.9721	-0.536899939	0.38853248	-0.304413596	0.301785569	0.925432419	0.606199165
-0.269434	-0.034579	-0.094026	0.105653	0.234855	0.199679	62.68875	-0.239875194	-0.162380853	-0.431404917	0.148906934	0.077494341	0.580311851
-0.454409	-0.114194	-0.490904	0.198644	0.340215	0.689548	61.90475	-0.005864076	0.308826839	0.016346772	-0.158804899	0.314690915	-0.175151672
-0.372984	0.049305	0.008683	0.035114	0.422289	0.026431	72.91665	-0.47120136	0.257187352	-0.557477345	0.272167342	0.728388712	0.829644687
-0.496865	-0.090827	-0.321801	-0.14784	0.406038	0.173961	75.0321	-0.164180416	0.268472455	-0.235555011	0.460063092	0.432652871	0.695618103
-0.342037	-0.040195	0.060138	0.12137	0.301842	0.061232	55.12825	-0.07809299	0.312434897	-0.198863141	0.236504098	0.390527887	0.435367238
-0.288438	-0.238593	0.067155	0.14072	0.049845	0.073565	66.6667	-0.309812036	0.549004012	-0.1970735	0.282442225	0.858816048	0.479515725
-0.286937	0.070173	-0.352025	0.11588	0.35711	0.467905	70.09805	-0.278135349	0.41937757	-0.405870665	0.324105192	0.69751292	0.729975856
-0.325825	-0.097687	-0.273719	0.058073	0.228138	0.331792	69.4538	-0.00340072	0.547237418	0.147780059	0.754999874	0.550638138	0.607219815
-0.555637	0.18677	-0.306156	0.143745	0.742407	0.449901	89.2857	-0.257204505	0.217898135	-0.28290796	0.333368254	0.475102641	0.616276214
-0.06862	-0.0704	-0.192664	-0.178266	-0.00178	0.014398	46.24765	-0.607820009	0.283132097	-0.51857931	0.487323822	0.890952106	1.005903132
-0.253988	0.049094	-0.133321	-0.148431	0.303082	-0.01511	56.0976	-0.321200768	0.755733108	-0.190736524	0.510532144	1.076933876	0.701268668
-0.232575	-0.276465	-0.011258	0.009624	-0.04389	0.020882	49.4418	-0.130349257	0.420403303	-0.127667227	0.4904826	0.55075256	0.618149828
