# Supplementary material for: The pupillary light response as a physiological index of aphantasia, sensory and phenomenological imagery strength
Source: eLife. 2022 Mar 31;11:e72484. doi: 10.7554/eLife.72484 (PMC9018072; doi:10.7554/eLife.72484)
Supplement: Figure 1—source data 2. [file elife-72484-fig1-data2.csv]

SS1	Viv1	Viv2	Viv3	Viv4		SS4	Viv1	Viv2	Viv3	Viv4
	0.144749	0.170019	0.212886	0.190929			-0.25568	-0.05523	-0.14066	0.05139
	0.264328	0.653482	0.413346	N/A			0.358209	0.017926	0.594508	0.485725
	-0.013	0.414674	0.391491	0.429726			-0.18592	-0.09288	0.009923	N/A
	-0.00214	-0.11544	0.005446	0.058524			-0.0781	-0.09111	0.049248	-0.01205
	N/A	0.047654	0.16689	0.07438			-0.31683	0.028404	0.212505	0.000395
	N/A	N/A	N/A	0.022314			N/A	N/A	0.154783	0.061024
	0.191235	0.213281	0.235	0.240133			-0.1743	-0.23466	0.01188	0.004807
	-0.22644	-0.08452	-0.00768	-0.04784			-0.00579	0.057735	0.280094	0.089261
	0.125049	0.248496	N/A	N/A			0.024859	0.116851	0.429809	0.391699
	0.097797	0.085266	0.144207	0.21272			0.015655	0.12938	0.200013	0.2141
	N/A	0.330054	0.391064	0.325493			0.134182	0.029924	0.22293	0.187131
	N/A	N/A	0.000632	0.000832			N/A	N/A	N/A	7.89E-02
	0.285216	0.26937	0.312954	0.324013			-0.00078	0.006435	0.009784	-0.1498
	N/A	N/A	0.12182	0.117914			N/A	N/A	0.220476	0.253301
	N/A	N/A	N/A	0.118799			N/A	N/A	N/A	0.175238
	0.014466	0.028063	0.038101	0.039289			0.007335	-0.03567	0.037752	-0.07337
	0.008069	0.029314	0.027751	0.016565			-0.38249	0.008123	-0.02473	0.001309
	0.310559	0.466652	0.339218	0.308282			-0.00054	-0.14383	0.009751	-0.19754
	N/A	0.328252	0.395496	0.398071			N/A	N/A	0.397659	0.166581
	-0.12087	0.151214	0.176773	0.170276			0.263759	0.470421	0.477961	0.314604
	0.002465	-0.09047	-0.01165	0.028138			N/A	0.01681	0.047289	0.034717
	N/A	0.201778	0.130939	0.258277			-0.01215	0.132537	0.352398	0.182064
	N/A	N/A	-0.09093	-0.10353			N/A	-0.01754	0.203555	-0.01288
	0.357465	0.287773	0.275573	0.387455			N/A	N/A	0.360166	0.317167
	0.095208	0.151767	0.091641	0.252207			-0.01225	-0.01765	0.003975	N/A
	0.194725	0.240337	0.211884	0.24442			0.031194	0.097333	0.298641	0.281175
	0.196436	0.23001	0.360114	0.373693			N/A	N/A	0.071826	0.293801
	-0.12826	0.166822	0.441566	0.329731			-0.28265	0.041709	0.155782	0.125333
	N/A	N/A	0.01918	0.000236			N/A	N/A	0.266821	0.298777
	N/A	0.238876	0.199195	0.213873			N/A	N/A	0.026799	0.026119
	N/A	N/A	0.250098	0.216769			N/A	N/A	0.443073	0.145967
	0.237964	0.279718	0.232145	0.301309			0.385918	0.11912	0.714374	0.598871
	0.38186	0.369132	0.381127	0.391162			N/A	N/A	0.026946	0.258338
	0.12085	0.299664	0.460906	0.563964			0.029113	0.105944	0.485835	0.173712
	0.025877	0.180377	0.274646	0.327903			0.008956	0.004063	-0.03546	-0.04312
	N/A	-0.23223	0.045035	0.055318			N/A	N/A	0.067251	0.087364
	0.248432	0.404831	0.371151	0.401248			-0.1913	0.27092	0.598832	0.343252
	0.119841	0.012	0.252042	0.211568			0.015589	0.159932	0.469597	0.394714
	N/A	0.490114	0.712744	0.789155			N/A	0.176086	0.569137	0.477185
	N/A	-0.03201	0.013279	-0.00163			N/A	N/A	0.175882	0.023964
	0.196642	0.23185	0.280135	0.317006			N/A	N/A	-0.01399	-0.0168
	0.037912	-0.00688	-0.04333	N/A			-0.05458	0.056726	0.03461	N/A
