# Supplementary material for: The pupillary light response as a physiological index of aphantasia, sensory and phenomenological imagery strength
Source: eLife. 2022 Mar 31;11:e72484. doi: 10.7554/eLife.72484 (PMC9018072; doi:10.7554/eLife.72484)
Supplement: Figure 2—source data 1. [file elife-72484-fig2-data1.csv]

BR_control	SS1_diff_score_controls	SS4_diff_score_controls		BR_aphan	SS1_diff_score_aphan	SS4_diff_score_aphan
66.49305	0.180035	-0.08887		48.14025	0.014079	-0.09874
60.41695	0.581865	0.370906		59.25	-0.19857	0.144817
67.3	0.381568	-0.15819		41	-0.09633	0.164466
52.62835	0.071981	-0.01045		48.9835	0.09638	-0.02349
56.25	0.117714	0.050348		49	0.071464	-0.05049
62.2475	0.022314	0.09425		57.8431	0.085294	0.005886
58.33335	0.248181	-0.00295		62.2	0.184543	0.139245
50.64025	-0.10724	0.089897		50.93	0.103162	-0.15615
71.66665	0.292849	0.264478		46.245	-0.05043	0.177485
75.6757	0.196527	0.129033		51.855	-0.01773	0.082793
67.67885	0.364445	0.134962		50	-0.03366	-0.0255
57.36135	0.000732	0.078877		46.32	-0.46062	-0.06602
50.6	0.312884	-0.00837		49.3333	-0.04053	-0.02974
72.38675	0.114465	0.233505		46.9879	0.106149	-0.02974
72.9392	0.097987	0.165238		55.47	-0.16663	-0.12921
48.75	0.036829	0.027569		47.22	-0.29838	0.193296
57.3481	0.029076	0.002346		47.0588	-0.06715	-0.0498
61.3838	0.35	-0.0077		56.666	-0.19197	-0.09865
87.5763	0.397782	0.169608
57.4074	0.169091	0.346098
54.3393	0.034319	0.035728
55.2178	0.200596	0.179258
49.64915	-0.09115	-0.02674
70.09805	0.33189	0.280607
56.62025	0.178216	-0.00492
64.89	0.2141	0.13195
52.5641	0.330189	0.100139
83.0357	0.345385	0.093086
53.07925	0.005782	0.280834
58.9721	0.192349	0.023677
62.68875	0.234855	0.199679
61.90475	0.340215	0.689548
72.91665	0.422289	0.026431
75.0321	0.406038	0.173961
55.12825	0.301842	0.061232
66.6667	0.049845	0.073565
70.09805	0.35711	0.467905
69.4538	0.228138	0.331792
89.2857	0.742407	0.449901
46.24765	-0.00178	0.014398
56.0976	0.303082	-0.01511
49.4418	-0.04389	0.020882
