# Supplementary material for: The pupillary light response as a physiological index of aphantasia, sensory and phenomenological imagery strength
Source: eLife. 2022 Mar 31;11:e72484. doi: 10.7554/eLife.72484 (PMC9018072; doi:10.7554/eLife.72484)
Supplement: Figure 3—source data 1. [file elife-72484-fig3-data1.csv]

SS1 _Bright	SS1 _Dark	SS4 _Bright	SS4 - Dark	Diff_SS1_imagery	Diff_SS4_Imagery	PercepSS1 _Bright	PercepSS1 _Dark	PercepSS4 _Bright	PercepSS4 - Dark	PDiff_SS1_imagery	PDiff_SS4_Imagery
-0.224781	-0.210702	-0.120107	-0.218847	0.014079	-0.09874	-0.224231552	-0.001022443	-0.195785348	0.13184367	0.223209109	0.327629018
-0.203631	-0.402201	-0.244926	-0.100109	-0.19857	0.144817	-0.192590449	0.341608899	-0.055577721	0.547757574	0.534199348	0.603335294
-0.175771	-0.272101	-0.252501	-0.088035	-0.09633	0.164466	-0.520486413	0.291738941	-0.44615659	0.316552304	0.812225354	0.762708894
-0.305827	-0.209447	-0.128821	-0.152311	0.09638	-0.02349	-0.156723331	0.068250845	-0.149349879	0.17120071	0.224974176	0.320550588
-0.272296	-0.200832	-0.140423	-0.190913	0.071464	-0.05049	-0.389026369	0.318656168	-0.438063342	0.271012236	0.707682536	0.709075578
-0.264391	-0.179097	-0.169147	-0.163261	0.085294	0.005886	-0.48655538	0.343598213	-0.294476194	0.373927384	0.830153593	0.668403578
-0.371695	-0.187152	-0.245192	-0.105947	0.184543	0.139245	-0.012840367	0.172402987	0.072858074	0.292850358	0.185243354	0.219992283
-0.26223	-0.159068	-0.117532	-0.273682	0.103162	-0.15615	-0.241689198	0.169438194	-0.18654214	0.102299972	0.411127392	0.288842112
-0.258797	-0.309227	-0.290242	-0.112757	-0.05043	0.177485	-0.611795625	0.438993329	0.348543737	-0.079782563	1.050788955	-0.4283263
-0.150333	-0.168063	-0.224866	-0.142073	-0.01773	0.082793	-0.332619419	0.103223491	-0.409058004	0.54925821	0.435842911	0.958316215
-0.270791	-0.304451	-0.09423	-0.11973	-0.03366	-0.0255	-0.094306755	0.238276752	-0.431861913	0.271851023	0.332583507	0.703712936
-0.024241	-0.484861	-0.203504	-0.269524	-0.46062	-0.06602	-0.007010653	0.245795102	-0.333415855	0.151869053	0.252805755	0.485284908
-0.314216	-0.354746	-0.150361	-0.180101	-0.04053	-0.02974	-0.209962745	-0.011299656	-0.157247165	-0.010907673	0.198663089	0.146339492
-0.394931	-0.288782	-0.133286	-0.163026	0.106149	-0.02974	-0.45921431	0.207102085	-0.448123925	0.157917418	0.666316395	0.606041343
-0.213693	-0.380323	-0.195852	-0.325062	-0.16663	-0.12921	0.043471957	0.351139804	-0.281471018	0.453362466	0.307667848	0.734833484
-0.107861	-0.406241	-0.265512	-0.072216	-0.29838	0.193296	-0.502026692	0.374743817	-0.330372076	0.497383243	0.876770509	0.827755319
-0.353131	-0.420281	-0.161282	-0.211082	-0.06715	-0.0498	-0.382982202	0.310548495	-0.358373455	0.337377294	0.693530697	0.695750749
-0.210032	-0.402002	-0.100893	-0.199543	-0.19197	-0.09865	-0.146163814	-0.032156831	-0.126854706	0.056079168	0.114006983	0.182933874
